# Supplementary material for: Intraepithelial and Lamina Propria Lymphocytes Do Not Correlate With Symptoms or Exposures in Microscopic Colitis
Source: PubMed Central journal article supplement — Clin Transl Gastroenterol. 2022 Feb 10;13(3):e00467. doi: 10.14309/ctg.0000000000000467 (PMC8963857; doi:10.14309/ctg.0000000000000467), 2022-02-10
Supplement: ct9-13-e00467-s002.pdf [file ct9-13-e00467-s002.pdf]

Supplementary Table 1. Comparison of mean percent lymphocytes by subtype of colitis -lymphocytic or collagenous

| T cell type           | N=21        |     | N=55        |     | N=34 |     | N=141    |     |
|-----------------------|-------------|-----|-------------|-----|------|-----|----------|-----|
|                       | Collagenous |     | Lymphocytic |     | Both |     | Controls |     |
|                       | Mean        | SD  | Mean        | SD  | Mean | SD  | Mean     | SD  |
| CD3+ epithelium       | 10.9        | 5.6 | 11.0        | 5.1 | 11.0 | 4.6 | 5.9      | 3.4 |
| CD3+ lamina propria   | 16.8        | 5.8 | 17.0        | 7.1 | 17.7 | 7.2 | 11.6     | 4.5 |
| CD8+ epithelium       | 4.9         | 2.9 | 7.6         | 5.8 | 5.8  | 3.4 | 2.4      | 2.0 |
| CD8+ lamina propria   | 6.3         | 2.3 | 7.9         | 4.4 | 7.1  | 3.4 | 3.6      | 2.1 |
| FOXP3+ epithelium     | 1.9         | 2.3 | 1.3         | 1.2 | 1.9  | 2.4 | 0.9      | 1.0 |
| FOXP3+ lamina propria | 4.7         | 4.2 | 5.8         | 4.8 | 5.9  | 4.5 | 3.0      | 2.5 |

SD, standard deviation
